# Supplementary material
Source: Elsevier journal article supplement (https://comptes-rendus.academie-sciences.fr/chimie/article/10.1016/j.crci.2012.08.008/file/attach/mmc1.pdf)

# checkCIF/PLATON report

You have not supplied any structure factors. As a result the full set of tests cannot be run.

No syntax errors found.      CIF dictionary      Interpreting this report

## Datablock: ce20

---

Bond precision:    C-C = 0.0050 A                      Wavelength=0.71073

Cell:                      a=15.4784(3)              b=21.5356(6)              c=22.0470(5)  
                                    alpha=90                      beta=90                      gamma=90

Temperature:              120 K

|                        | Calculated                   | Reported           |
|------------------------|------------------------------|--------------------|
| Volume                 | 7349.1(3)                    | 7349.1(3)          |
| Space group            | P 21 21 21                   | P212121            |
| Hall group             | P 2ac 2ab                    | ?                  |
| Moiety formula         | 4(C58 H96 N4 O28), C10 H24 ? |                    |
| Sum formula            | C242 H408 N16 O112           | C60.50 H102 N4 O28 |
| Mr                     | 5333.87                      | 1333.46            |
| Dx,g cm <sup>-3</sup>  | 1.205                        | 1.205              |
| Z                      | 1                            | 4                  |
| Mu (mm <sup>-1</sup> ) | 0.095                        | 0.095              |
| F000                   | 2868.0                       | 2868.0             |
| F000'                  | 2869.72                      |                    |
| h,k,lmax               | 19,27,28                     | 19,27,28           |
| Nref                   | 8745[ 16056]                 | 14608              |
| Tmin,Tmax              | 0.992,0.994                  |                    |
| Tmin'                  | 0.970                        |                    |

Correction method= Not given

Data completeness= 1.67/0.91                      Theta(max)= 27.000

R(reflections)= 0.0495( 7646)                      wR2(reflections)= 0.1386( 14608)

S = 0.615                                              Npar= 839

---

The following ALERTS were generated. Each ALERT has the format

**test-name\_ALERT\_alert-type\_alert-level.**

Click on the hyperlinks for more details of the test.

---

### Alert level A

|                                     |                               |            |
|-------------------------------------|-------------------------------|------------|
| PLAT213_ALERT_2_A Atom C18          | has ADP max/min Ratio .....   | 5.9 prola  |
| PLAT222_ALERT_3_A Large Non-Solvent | H      Uiso(max)/Uiso(min) .. | 10.0 Ratio |

---

### ● Alert level B

```
PLAT035_ALERT_1_B No _chemical_absolute_configuration info given .           ?
PLAT220_ALERT_2_B Large Non-Solvent      C      Ueq(max)/Ueq(min) ...      10.0 Ratio
PLAT220_ALERT_2_B Large Non-Solvent      O      Ueq(max)/Ueq(min) ...      4.2 Ratio
PLAT220_ALERT_2_B Large Non-Solvent      C      Ueq(max)/Ueq(min) ...      4.3 Ratio
PLAT242_ALERT_2_B Check Low              Ueq as Compared to Neighbors for      013
PLAT413_ALERT_2_B Short Inter XH3 .. XHn  H18B .. H19A ..      1.97 Ang.
PLAT413_ALERT_2_B Short Inter XH3 .. XHn  H57B .. H71E ..      2.06 Ang.
```

---

### ● Alert level C

```
DIFMX01_ALERT_2_C The maximum difference density is > 0.1*ZMAX*0.75
  _refine_diff_density_max given =      0.669
  Test value =      0.600
DIFMX02_ALERT_1_C The maximum difference density is > 0.1*ZMAX*0.75
  The relevant atom site should be identified.
GOODF01_ALERT_2_C The least squares goodness of fit parameter lies
  outside the range 0.80 <> 2.00
  Goodness of fit given =      0.615
STRVA01_ALERT_4_C      Flack parameter is too small
  From the CIF: _refine_ls_abs_structure_Flack      -0.300
  From the CIF: _refine_ls_abs_structure_Flack_su      0.800
PLAT029_ALERT_3_C _diffrn_measured_fraction_theta_full Low .....      0.969
PLAT094_ALERT_2_C Ratio of Maximum / Minimum Residual Density ....      3.03
PLAT097_ALERT_2_C Large Reported Max. (Positive) Residual Density      0.67 eA-3
PLAT213_ALERT_2_C Atom O13              has ADP max/min Ratio .....      3.5 prola
PLAT340_ALERT_3_C Low Bond Precision on  C-C Bonds .....      0.0050 Ang
PLAT601_ALERT_2_C Structure Contains Solvent Accessible VOIDS of .      56 A**3
```

---

### ● Alert level G

```
REFLT03_ALERT_4_G ALERT: MoKa measured Friedel data cannot be used to
  determine absolute structure in a light-atom
  study EXCEPT under VERY special conditions.
  It is preferred that Friedel data is merged in such cases.
  From the CIF: _diffrn_reflms_theta_max      27.00
  From the CIF: _reflms_number_total      14608
  Count of symmetry unique reflms      8745
  Completeness (_total/calc)      167.04%
  TEST3: Check Friedels for noncentro structure
  Estimate of Friedel pairs measured      5863
  Fraction of Friedel pairs measured      0.670
  Are heavy atom types Z>Si present      no
PLAT005_ALERT_5_G No _iucr_refine_instructions_details in CIF ....      ?
PLAT032_ALERT_4_G Std. Uncertainty on Flack Parameter Value High .      0.800
PLAT045_ALERT_1_G Calculated and Reported Z Differ by .....      0.25 Ratio
PLAT072_ALERT_2_G SHELXL First Parameter in WGHT Unusually Large.      0.12
PLAT242_ALERT_2_G Check Low              Ueq as Compared to Neighbors for      C72A
PLAT242_ALERT_2_G Check Low              Ueq as Compared to Neighbors for      C74A
PLAT242_ALERT_2_G Check Low              Ueq as Compared to Neighbors for      C75A
PLAT242_ALERT_2_G Check Low              Ueq as Compared to Neighbors for      C75B
PLAT301_ALERT_3_G Note: Main Residue Disorder .....      3 Perc.
PLAT791_ALERT_4_G Note: The Model has Chirality at C1 (Verify)      R
PLAT791_ALERT_4_G Note: The Model has Chirality at C2 (Verify)      R
PLAT791_ALERT_4_G Note: The Model has Chirality at C3 (Verify)      R
PLAT791_ALERT_4_G Note: The Model has Chirality at C4 (Verify)      S
PLAT791_ALERT_4_G Note: The Model has Chirality at C5 (Verify)      R
PLAT791_ALERT_4_G Note: The Model has Chirality at C11 (Verify)      R
PLAT791_ALERT_4_G Note: The Model has Chirality at C12 (Verify)      R
PLAT791_ALERT_4_G Note: The Model has Chirality at C13 (Verify)      R
PLAT791_ALERT_4_G Note: The Model has Chirality at C14 (Verify)      S
```

|                   |                                      |          |   |
|-------------------|--------------------------------------|----------|---|
| PLAT791_ALERT_4_G | Note: The Model has Chirality at C15 | (Verify) | R |
| PLAT791_ALERT_4_G | Note: The Model has Chirality at C21 | (Verify) | R |
| PLAT791_ALERT_4_G | Note: The Model has Chirality at C22 | (Verify) | R |
| PLAT791_ALERT_4_G | Note: The Model has Chirality at C23 | (Verify) | R |
| PLAT791_ALERT_4_G | Note: The Model has Chirality at C24 | (Verify) | S |
| PLAT791_ALERT_4_G | Note: The Model has Chirality at C25 | (Verify) | R |
| PLAT791_ALERT_4_G | Note: The Model has Chirality at C31 | (Verify) | R |
| PLAT791_ALERT_4_G | Note: The Model has Chirality at C32 | (Verify) | R |
| PLAT791_ALERT_4_G | Note: The Model has Chirality at C33 | (Verify) | R |
| PLAT791_ALERT_4_G | Note: The Model has Chirality at C34 | (Verify) | S |
| PLAT791_ALERT_4_G | Note: The Model has Chirality at C35 | (Verify) | R |
| PLAT791_ALERT_4_G | Note: The Model has Chirality at C41 | (Verify) | R |
| PLAT791_ALERT_4_G | Note: The Model has Chirality at C42 | (Verify) | R |
| PLAT791_ALERT_4_G | Note: The Model has Chirality at C43 | (Verify) | R |
| PLAT791_ALERT_4_G | Note: The Model has Chirality at C44 | (Verify) | S |
| PLAT791_ALERT_4_G | Note: The Model has Chirality at C45 | (Verify) | R |
| PLAT791_ALERT_4_G | Note: The Model has Chirality at C51 | (Verify) | R |
| PLAT791_ALERT_4_G | Note: The Model has Chirality at C52 | (Verify) | R |
| PLAT791_ALERT_4_G | Note: The Model has Chirality at C53 | (Verify) | R |
| PLAT791_ALERT_4_G | Note: The Model has Chirality at C54 | (Verify) | S |
| PLAT791_ALERT_4_G | Note: The Model has Chirality at C55 | (Verify) | R |

---

2 **ALERT level A** = Most likely a serious problem - resolve or explain  
7 **ALERT level B** = A potentially serious problem, consider carefully  
10 **ALERT level C** = Check. Ensure it is not caused by an omission or oversight  
40 **ALERT level G** = General information/check it is not something unexpected

3 **ALERT type 1** CIF construction/syntax error, inconsistent or missing data  
18 **ALERT type 2** Indicator that the structure model may be wrong or deficient  
4 **ALERT type 3** Indicator that the structure quality may be low  
33 **ALERT type 4** Improvement, methodology, query or suggestion  
1 **ALERT type 5** Informative message, check

---

It is advisable to attempt to resolve as many as possible of the alerts in all categories. Often the minor alerts point to easily fixed oversights, errors and omissions in your CIF or refinement strategy, so attention to these fine details can be worthwhile. In order to resolve some of the more serious problems it may be necessary to carry out additional measurements or structure refinements. However, the purpose of your study may justify the reported deviations and the more serious of these should normally be commented upon in the discussion or experimental section of a paper or in the "special\_details" fields of the CIF. checkCIF was carefully designed to identify outliers and unusual parameters, but every test has its limitations and alerts that are not important in a particular case may appear. Conversely, the absence of alerts does not guarantee there are no aspects of the results needing attention. It is up to the individual to critically assess their own results and, if necessary, seek expert advice.

### **Publication of your CIF in IUCr journals**

A basic structural check has been run on your CIF. These basic checks will be run on all CIFs submitted for publication in IUCr journals (*Acta Crystallographica*, *Journal of Applied Crystallography*, *Journal of Synchrotron Radiation*); however, if you intend to submit to *Acta Crystallographica Section C* or *E*, you should make sure that full publication checks are run on the final version of your CIF prior to submission.

### **Publication of your CIF in other journals**

Please refer to the *Notes for Authors* of the relevant journal for any special instructions relating to CIF submission.

---

**PLATON version of 04/07/2012; check.def file version of 28/06/2012**

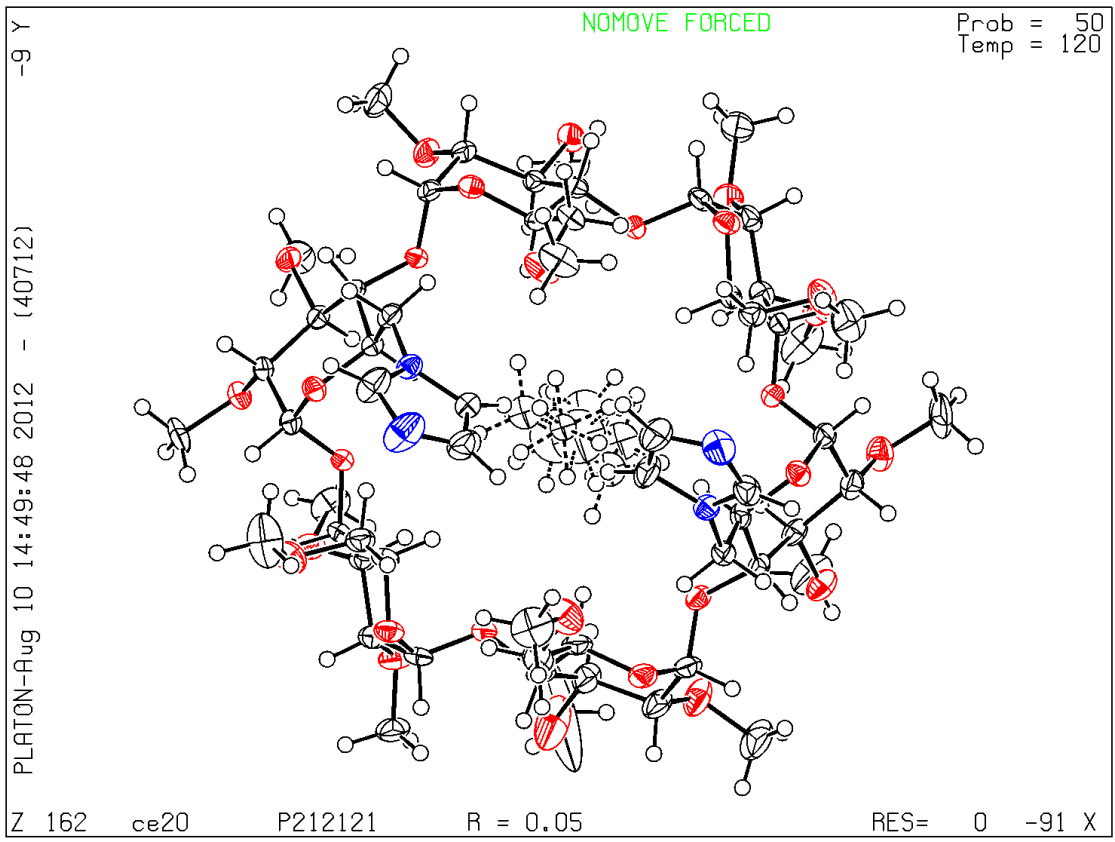

Supplement: mmc1 [file mmc1.pdf]
